1                   **CRISPR/Cas13a signal amplification linked**  
2                   **immunosorbent assay (CLISA)**

3

4    Qian Chen<sup>1</sup>, Tian Tian<sup>2</sup>, Erhu Xiong<sup>2</sup>, Po Wang<sup>1\*</sup>, Xiaoming Zhou<sup>2\*</sup>

5    1 School of Chemistry and Materials Science, Jiangsu Normal University, Xuzhou 221116, China.

6    2 College of Biophotonics & School of Life Sciences, South China Normal University, Guangzhou  
7    510631, China.

8

9    *Supporting Information*

10

11 **ABSTRACT:** The enzyme-linked immunosorbent assay (ELISA) is a basic technique used in analytical and  
12 clinical investigations. However, conventional ELISA is still not sensitive enough to detect ultra-low  
13 concentrations of biomarkers for the early diagnosis of cancer, cardiovascular risk, neurological disorders,  
14 and infectious diseases. Herein we show a mechanism utilizing the CRISPR/Cas13a-based signal export  
15 amplification strategy, which double-amplifies the output signal by T7 RNA polymerase transcription and  
16 CRISPR/Cas13a collateral cleavage activity. This process is termed the CRISPR/Cas13a signal amplification  
17 linked immunosorbent assay (CLISA). The proposed method was validated by detecting an inflammatory  
18 factor, human interleukin-6 (human IL-6), and a tumor marker, human vascular endothelial growth factor  
19 (human VEGF), which achieved limit of detection (LOD) values of 45.81 fg/mL (2.29 fM) and 32.27 fg/mL  
20 (0.81 fM), respectively, demonstrating that CLISA is at least  $10^2$ -fold more sensitive than conventional  
21 ELISA.

22

## 23 **INTRODUCTION**

24 Immunoassays can be utilized for detecting almost any biomolecules, including proteins, small molecules,  
25 vesicles, nucleic acids, and even whole cells<sup>1-2</sup>. Since the invention of this method in the 1960s,  
26 immunoassays have undergone a developmental phase from radioimmunoassays to enzyme-linked  
27 immunoassays<sup>3</sup>. Using enzymes rather than radioactivity as the reporter label, enzyme-linked immunoassays,  
28 also termed enzyme-linked immunosorbent assays (ELISAs), have become the most widely used technique  
29 in both fundamental and applied immunological research<sup>3</sup>. With enzymatic signal amplification, ELISA has  
30 achieved a limit of detection (LOD) of approximately 0.01–50 ng/mL (pM to nM), depending on the affinity  
31 of the antibody<sup>4</sup>. Although it has achieved wide adoption in conventional diagnostic applications, ELISA is  
32 still not sensitive enough to detect ultra-low concentrations of biomarkers in the early diagnosis of cancer,  
33 cardiovascular risk, neurological disorders, and infectious diseases<sup>5</sup>.

34 To enhance the sensitivity of ELISA, current research has focused on improving the activity of enzymes,  
35 such as the currently popular nanozymes<sup>6-7</sup>. In addition, the researchers have explored nanoprobe to load  
36 enzymes due to their large specific surface area, which can increase the load of enzyme and achieve signal  
37 amplification<sup>8-9</sup>. However, since the nanomaterial is a non-biological material, it may impair the enzyme  
38 activity due to the low biocompatibility. Further, the nonuniformity of the nanoparticle may lead to a

39 great error in measurements. Instead of an enzyme, a reporter using a DNA sequence as a signal output can  
40 significantly improve the sensitivity of the ELISA method. Typical examples include immuno-PCR<sup>10-12</sup>,  
41 immuno-RCA<sup>13-14</sup>, immuno-HCR<sup>15-16</sup>, proximity ligation assays<sup>17-18</sup>, and T7 transcription amplification<sup>19</sup>. As  
42 a consequence, the LOD of a given ELISA is, in general, enhanced 10~10<sup>4</sup>-fold by the use of DNA as a  
43 signal amplification element. Even with these developments, there are still significant challenges for their  
44 widespread adoption in analytical and clinical investigations. Possible limiting factors include the inability to  
45 achieve quantitative detection due to nonlinear signal amplification, which requires additional testing  
46 equipment and detection steps and, thus, is incompatible with existing commercial ELISA platforms.

47 CRISPR/Cas13a has been recently demonstrated to have RNA-directed RNA cleavage ability<sup>20-22</sup>. This  
48 RNA-guided trans-endonuclease activity is highly specific, being activated only when the target RNA has  
49 the perfect complementary sequence to the crRNA, and highly efficient (at least 10<sup>4</sup> turnovers per target  
50 RNA recognition)<sup>20-22</sup>. This potent signal amplification ability of CRISPR/Cas13a enables the development  
51 of direct RNA assays with a sensitivity down to the fM level<sup>20, 22-23</sup>. Single molecule RNA  
52 detection could also be achieved when combined with a digital droplet assay<sup>24</sup>. Although there has been  
53 extensive development in nucleic acid detection, a CRISPR/Cas13a system has not yet been explored as an  
54 exciting opportunity for an immunoassay.

55 Herein, we report a new version of ELISA performed via the utilization of CRISPR/Cas13a as a signal  
56 export amplification strategy, which double-amplifies the output signal by T7 RNA polymerase transcription  
57 and CRISPR/Cas13a collateral cleavage activity: this strategy is called the CRISPR/Cas13a signal  
58 amplification linked immunosorbent assay (CLISA). It is the first example, to our knowledge, of the  
59 construction of a highly sensitive immunoassay based on a CRISPR technique.

60

## 61 **EXPERIMENTAL SECTION**

62 **Experimental materials and instruments.** All chemicals were purchased from the Guangzhou Chemical  
63 Reagent Factory. All DNA sequences were synthesized by Sangon Biotech (Shanghai), and fluorescent  
64 double-labeled probes were synthesized by Takara (Japan). All of the DNA and RNA sequences are  
65 provided in Table S1. T7 RNA polymerase, NTP, and transcription buffer were from Bio-Lifesci  
66 (Guangzhou, China). Human IL-6 and VEGF antigens and antibodies were purchased from KEY-BIO  
67 (Beijing, China). Commercial human IL-6 and human VEGF ELISA kits were purchased from ExCell

68 Biotech (Shanghai, China). The reagents for protein expression and purification were obtained from  
69 Abiotech (Jinan, China). The plasmid used to express LbuCas13a is a gift from Professor Wang Yanli  
70 (Institute of Biophysics, Chinese Academy of  
71 Sciences). Fluorescence detection was performed on a SpectraMax iD5 multi-mode microplate reader  
72 (Molecular Devices). The PAGE electrophoresis experiments were performed using an instrument (Beijing  
73 Liuyi). All other solutions and buffers were prepared using ultrapure water (> 18.25 MΩ).

74

75 **Expression and purification of LbuCas13a proteins.** *Escherichia coli* Rosetta 2 (DE3) cells were  
76 cultured overnight in Terrific Broth containing chloramphenicol and ampicillin to express the LbuCas13a  
77 protein. Then, IPTG was added and induced at 37 °C for 4 h. The collected bacterial solution was  
78 centrifuged to obtain a precipitate and lysed by sonication in 20 mM Tris-HCl, pH 7.5, containing 1 M NaCl,  
79 20 mM imidazole, and 10% glycerol. The supernatant was purified using a nickel column (Abiotech, Jinan,  
80 China) and eluted with eluent 1 (20 mM Tris-HCl, pH 7.5, 250 mM imidazole, and 150 mM NaCl) after  
81 centrifugation at 4 °C. Then the eluted LbuCas13a protein was purified again using a heparin column  
82 (Abiotech, Jinan, China), and the protein was eluted with eluent 2 (20 mM Tris-HCl, pH 7.5, 1 M NaCl, and  
83 10% glycerol). Finally, the protein was collected, and glycerol was added to a final concentration of 50%.  
84 The protein was stored at -80 °C for further use (Figure S1B).

85

86 **In Vitro Transcription of crRNA.** The crRNA was prepared by in vitro transcription. The crDNA1 and  
87 crDNA2 templates were heated to 95 °C and then slowly cooled to room temperature for annealing. In a 50  
88 µL transcription system, 250 U T7 RNA polymerase, NTPs (final concentration of 0.5 mM), 50 U  
89 recombination RNase inhibitor and 200 ng of template DNA were added and incubated for 4 h at 37 °C.  
90 Then, DNase I was added to digest the excess DNA template. Finally, the product of this reaction was  
91 purified by an RNA purification kit and stored at -20 °C for further use (Figure S1A).

92

93 **CLISA reaction.** Dilutions of the specific antibody protein (5 µg / mL) in a coating buffer  
94 (carbonate-bicarbonate buffer, pH 9.6) were added to the plate, 0.1 mL per well, and incubated at 4 °C  
95 overnight. Then, the plate was blocked by adding 1% BSA protein, 0.3 mL per well, and incubated at 37 °C  
96 for 1 h. Serial dilutions of antigen were added to the plate, 0.1 mL per well, and incubated at 37 °C for 1 h.

97 Diluted biotinylated detection antibody (50 ng / mL) was added to the plate, 0.1 mL per well, and incubated  
98 at 37 °C for 1 h. Streptavidin and a biotinylated dsDNA amplification template were added to the plate one  
99 by one (0.1 mL per well) and incubated at 37 °C for 0.5 h. The non-bound solution was removed, and the  
100 wells were  
101 washed five times with PBS buffer containing 0.05% Tween-20 between each binding incubation. Finally,  
102 50 µL of the reaction mixture (1×T7 buffer, 150 U T7 RNA polymerase, 1.25 mM NTPs) was added to each  
103 well and reacted at 37 °C for 1 h. Then, 100 µL of the Cas13a reaction system (final concentration of 100  
104 nM LbuCas13a, 200 nM crRNA, 200 nM RNA fluorescent probe) was performed in different concentrations  
105 of the antigen wells. Fluorescent signals were recorded on a SpectraMax iD5 multi-function microplate  
106 reader. The reaction was conducted at 37 °C for 30 min and the fluorescence signal was recorded every  
107 minute.

108 For simplified CLISA detection, streptavidin was directly coated on 96-well plates. Then, the plate was  
109 blocked with 1% BSA protein, and a biotinylated dsDNA amplification template was added to the plate (0.1  
110 mL per well) and incubated at 37 °C for 0.5 h. Next, we carried out the standard CLISA method.

111

112 **ELISA reaction.** Serial dilutions of antigen were added to the plates at an amount of 100 µL per well  
113 following the protocol of the commercial kit and incubated at 37 °C for 1.5 h. Diluted biotinylated antibody  
114 working solution (100 µL/well) was added to each well and incubated at 37 °C for 1 h. Next, diluted  
115 enzyme-binding working solution (100 µL/well) was added to each well and incubated at 37 °C for 30  
116 minutes in the dark. The plate was washed five times with wash solution between each binding incubation.  
117 Finally, a chromogenic substrate (100 µL/well) was added and incubated at 37 °C for 15 min in the dark.  
118 Stop solution (100 µL/well) was added and the OD<sub>450</sub> value (within 10 min) was measured immediately after  
119 mixing.

120

## 121 **RESULTS AND DISCUSSION**

122 Prior to carrying out the CLISA, the collateral cleavage activity of CRISPR/Cas13a and the sensitivity of  
123 detecting the template RNA were first demonstrated. The CRISPR/Cas13a cleavage mechanism is shown in  
124 Figure 1A. Cas13a exhibits high activity under the guidance of crRNA in the presence of a synthesized  
125 target RNA. As shown in Figure 1B, the collateral cleavage activity of Cas13a can only be activated when

126 Cas13a/crRNA/target RNA are present simultaneously (red curve). After that, we performed the  
127 CRISPR/Cas13a assay for RNA detection. As shown in Figure 1C, with the increase of target RNA  
128 concentrations, the fluorescence signals enhanced gradually, and the CRISPR/Cas13a system was able to  
129 detect the target RNA at as low of a concentration of 50 fM. Figure 1D shows an enlarged view of the low  
130 concentration measurement curve in Figure 1C. Direct detection of RNA at a fM sensitivity level without a  
131 target RNA amplification indicates that the Cas13a system is one of the most sensitive detection assays  
132 currently known. Furthermore, we introduced the transcription process before the CRISPR/Cas13a assay,  
133 using T7 promoter tagged DNA instead of RNA to avoid any instability problem during the procedure of  
134 incubation and washing. CRISPR/Cas13a was applied to detect the DNA transcripts for further enhancement  
135 of the sensitivity. As shown in Figure 1E, the T7 transcription process was added prior to the  
136 CRISPR/Cas13a assay. The results show that CRISPR/Cas13a is capable  
137 of detecting DNA transcripts at concentrations as low as 500 aM (as shown in Figure 1F, G), and Figure 1G  
138 presents an enlarged view of the low concentration curve in Figure 1F. The LOD of post-transcriptional  
139 detection was enhanced by two orders of magnitude compared to direct RNA detection.

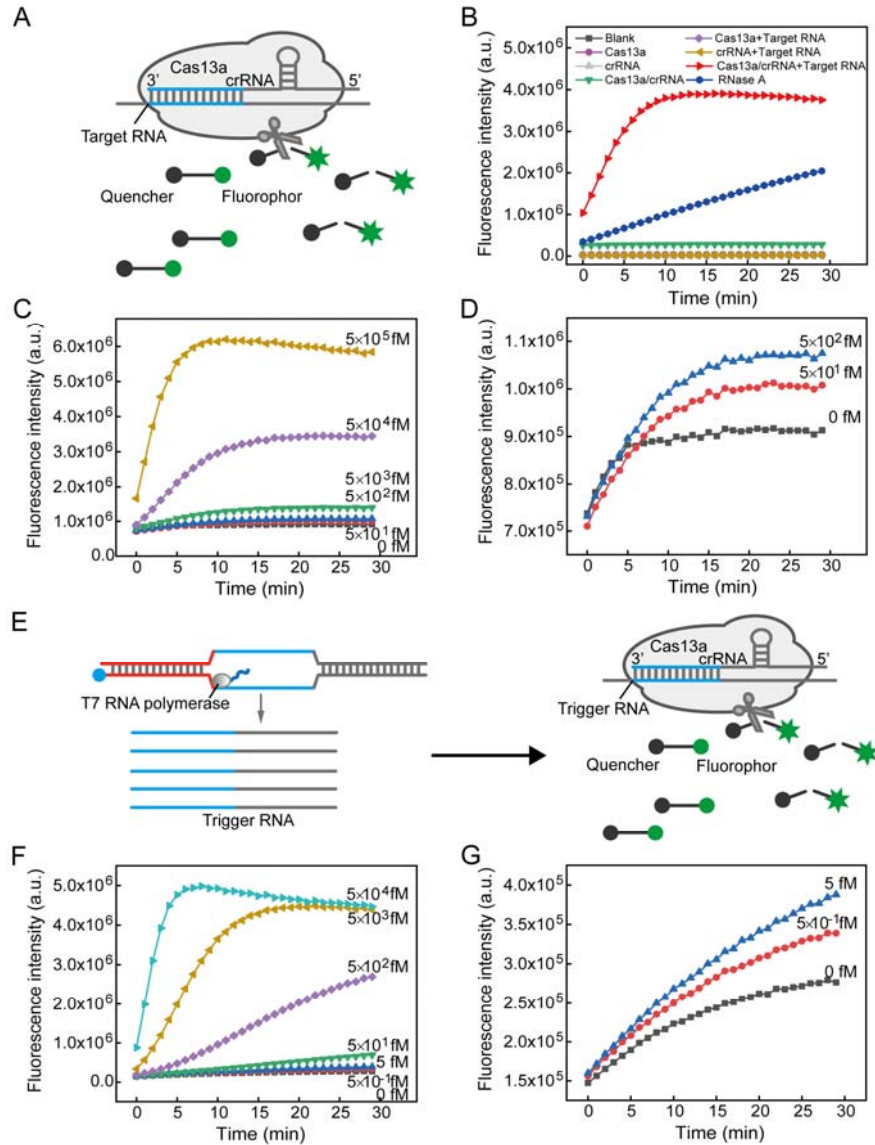

140

141 **Figure 1.** (A) Schematic for the principle of a Cas13a/crRNA-mediated RNA triggered signal amplification system. (B)

142 Fluorescence measurement of LbuCas13a activity. RNase A was used as a positive control for the degradation of the

143 RNA reporter probe. (C) Sensitivity of Cas13a/crRNA-mediated target RNA detection. Real-time fluorescence kinetic

144 measurement of Cas13a reactions initiated by target RNA concentrations from 50 to  $5 \times 10^5$  fM. (D) An enlarged view of

145 the curves at the low concentrations of 0, 50, and 500 fM in Figure C. Data represent mean  $\pm$  s.d., n = 3, three technical

146 replicates. (E) Schematic for the principle of a Cas13a/crRNA-mediated RNA triggered signal amplification system after

147 DNA transcription. (F) Sensitivity of Cas13a/crRNA-mediated RNA detection after DNA transcription. Real-time

148 fluorescence kinetic measurement of Cas13a reactions initiated by transcription of DNA concentrations from 0.5 to  $5 \times 10^4$

149 fM. (G) An enlarged view of the curves at the low concentrations of 0, 0.5, and 5 fM in Figure F. Data represent mean  $\pm$   
150 s.d., n = 3, three technical replicates.

151

152 The achieved impressive sensitivity enabled us to construct a new ELISA built on the basis of a  
153 transcription assisted CRISPR/Cas13a assay. As is well known, classical ELISA is a heterogeneous assay  
154 format using a solid phase well plate. We next proved the feasibility of utilizing DNA transcription for this  
155 purpose by using a 96-well plate. As shown in Figure 2A, streptavidin was used to directly coat the 96-well  
156 plates, and then the plates were blocked with 1% BSA protein. A biotinylated DNA amplification template  
157 containing a T7 promoter sequence at one end was then added to the plate. Then, the unbound DNA  
158 amplification template was removed by washing. Next, transcription reaction buffer, T7 RNA polymerase,  
159 and nucleotide triphosphates (NTPs) were mixed together and transcribed at 37 °C for 1 h. Finally, the  
160 transcription products were detected by CRISPR/Cas13a. The fluorescence kinetic curves of each well were  
161 recorded, and the fluorescence intensity increased at 50 pM of template DNA (Figure 2B, red curve). In  
162 addition, the results were also expressed by the calibration values ( $\Delta\tau$ ) in Figure 2C. In the presence of 50  
163 pM template DNA, the  $\Delta\tau$  value was much stronger than that of the negative control, indicating that the  
164 template DNA was successfully ligated to the plate and the DNA transcript can be successfully detected in a  
165 solid phase format.

166

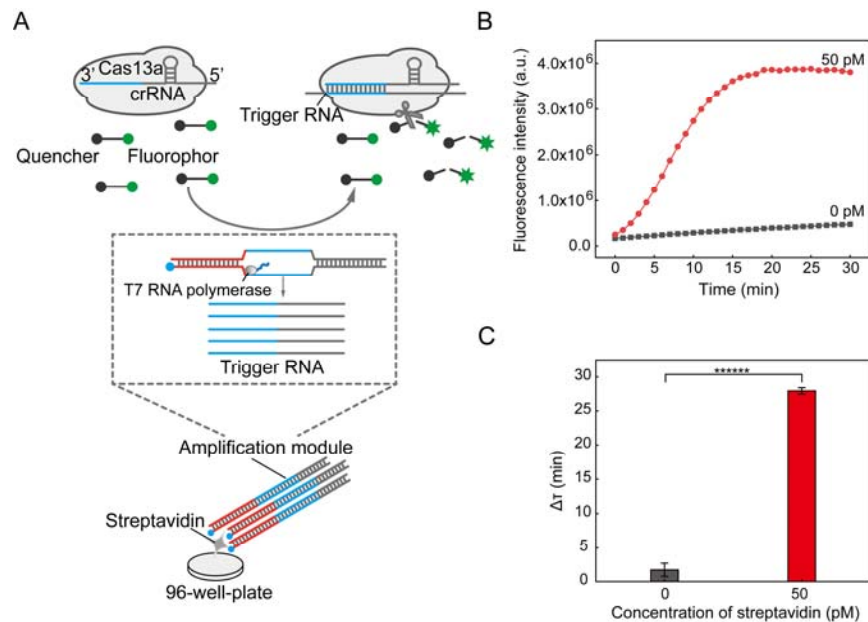

167



168 **Figure 2.** Validation of the compatibility of the Cas13a/crRNA-mediated RNA detection system with solid phase DNA  
169 transcription. (A) Streptavidin was precoated on a 96-well plate. The biotin-dsDNA amplification template (the  
170 amplification module) then bound to the streptavidin. The bound biotin-dsDNA was used as the template for DNA  
171 transcription by T7 RNA polymerase. (B) Real-time fluorescence kinetic measurement of simplified CLISA. The  
172 threshold was set to determine the critical time  $\tau$ , which is the minimal time to reach the threshold. A calibration curve  
173 was then established by plotting  $\Delta\tau$  ( $\Delta\tau = 30 \text{ min} - \tau$ ) as a function of the concentrations of antigen (C) (Student's t-test;  
174 \*\*\*\*\*P < 0.00001). Data represent mean  $\pm$  s.d., n = 3, three technical replicates.

175 After demonstrating a solid phase transcription assisted CRISPR/Cas13a assay, CLISA was developed by  
176 utilizing streptavidin as a bridge to link biotinylated detection antibodies to biotinylated DNA amplification  
177 templates, followed by DNA transcription to produce trigger RNA. The Cas13a system was then employed  
178 to detect the product, and when a trigger RNA is present, a substantial number of signal probes can be  
179 cleaved for a second signal amplification. In the CLISA, antigen-antibody binding, template transcription  
180 and Cas13a detection were all performed at 37 °C.

181 We chose human IL-6 and human VEGF as models to validate the CLISA. Human IL-6 is an  
182 inflammatory factor produced by tumor cells, T cells, and lymphocytes<sup>25-26</sup>. Human VEGF is involved in the  
183 pathogenesis and progression of many angiogenesis-dependent diseases, including cancer, certain  
184 inflammatory diseases, and diabetic retinopathy<sup>27</sup>. Human IL-6 and human VEGF have been considered to  
185 be important factors in disease development.

186 First, we applied CLISA to detect human IL-6. Serially diluted human IL-6 antigen and biotinylated  
187 detection antibody were added sequentially to form 'antibody-antigen-antibody' complexes. After that,  
188 streptavidin and the biotinylated DNA amplification template, which has been optimized as shown in Figure  
189 S3, were added sequentially, resulting in binding of the DNA amplification template to the  
190 'antibody-antigen-antibody' complex. Unbound templates were washed away, and then T7 RNA polymerase  
191 was utilized to amplify the amplification template (Figure 3A). As shown in Figure 3B, it is noted that the  $\Delta\tau$   
192 is linear with the logarithm of human IL-6 concentrations in the range from 160 fg/ mL (8 fM) to 0.1 ng/mL  
193 (5 pM), and the linear regression equation is  $\Delta\tau = 8.496 \lg C - 14.112$  ( $R^2 = 0.989$ ) with a LOD of 45.81  
194 fg/mL(2.29 fM). In addition, a commercial human IL-6 ELISA kit was subjected to the same experiment and  
195 showed a LOD of 12.09 pg/mL (605 fM) (blue curve). It is significant that the sensitivity of CLISA was  
196 264-fold higher than that of the commercial ELISA kit.

197 In addition, as displayed in Figure 3C, we also applied CLISA to detect human VEGF. In the range of 160  
198 fg/mL (4 fM) to 0.1 ng/mL (2.5 pM) of human VEGF, there is a linear relationship between the  $\Delta\tau$  and the  
199 logarithm of human VEGF concentrations, with a linear regression equation of  $\Delta\tau = 6.347 \lg C - 9.577$  ( $R^2 =$   
200 0.985) and a LOD as low as 32.27 fg/mL (0.81 fM). The commercial ELISA human VEGF kit showed a  
201 LOD of 20 pg/mL (500 fM) (Figure 3C). This result indicated that the LOD of the CLISA was also reduced  
202 by 617-fold compared to the commercial ELISA kit.  
203

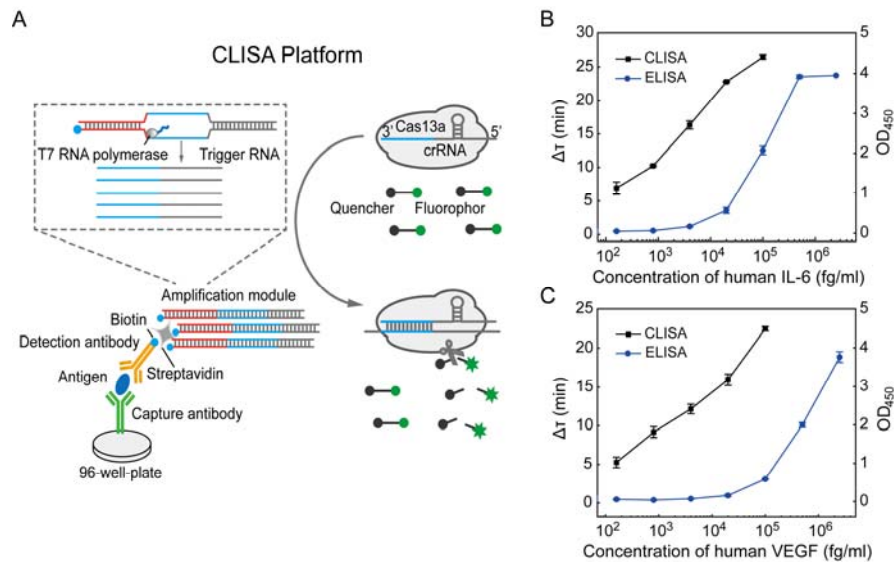

204  
205 **Figure 3.** (A) Schematic for the principle of CLISA. In a CLISA assay, the capture antibody first binds to the antigen of  
206 interest. A detection antibody, which binds to a distant, nonoverlapping epitope in the antigen, is biotinylated and linked  
207 to a biotin-dsDNA template (the amplification module) through streptavidin. T7 RNA polymerase is then used to amplify  
208 the DNA template, producing many copies of RNA substrate, the amount of which is representative of the original  
209 amount of antigen. (B) Detection of human IL-6. Human IL-6 was added to the coated plate at a series of five-fold  
210 dilutions from 160 fg/mL (8 fM) to 100 pg/mL (5 pM). A parallel ELISA experiment was also performed with a series of  
211 fivefold dilutions from 160 fg/mL (8 fM) to 2.5 ng/mL (125 pM). Data represent mean  $\pm$  s.d.,  $n = 3$ , three technical  
212 replicates. (C) Detection of human VEGF. Human VEGF was added to the coated plate at a series of five-fold  
213 dilutions from 160 fg/mL (4 fM) to 100 pg/mL (2.5 pM). A parallel ELISA experiment was also performed at a series of fivefold  
214 dilutions from 160 fg/mL (4 fM) to 2.5 ng/mL (62.5 pM). Data represent mean  $\pm$  s.d.,  $n = 3$ , three technical replicates.

215

216 Next, we evaluated the analytical potential of the CLISA method for complex samples (Table 1). We  
217 added human IL-6 to diluted mouse serum (20%) to demonstrate whether the CLISA method is as resistant  
218 to matrix interference as a conventional ELISA method. The recovery test evaluating from three  
219 concentrations (100, 20, and 4 pg/mL) of human IL-6 samples showed that the recoveries were 96.21%,  
220 101.32%, and 104.15%, respectively. Since the procedure of the current CLISA method requires washing  
221 similar to the conventional ELISA method, it is not surprising that the CLISA method has achieved an  
222 excellent anti-interference ability.

223

224 **Table 1.** Recovery experiments of human IL-6 in serum samples

| Spiked concn (pg/mL) | Mean $\pm$ SD (pg/mL) | Recovery (%) |
|----------------------|-----------------------|--------------|
| 100                  | 96.21 $\pm$ 7.03      | 96.21        |
| 20                   | 20.26 $\pm$ 4.20      | 101.32       |
| 4                    | 4.17 $\pm$ 3.90       | 104.14       |

225

226 Compared with the traditional ELISA, CLISA adds a transcription process to expand the target, and the  
227 signal is further enhanced by the collateral cleavage activity of CRISPR/Cas13a. As a result, the sensitivity  
228 of CLISA can be effectively ameliorated by two-step amplification. Furthermore, the whole process of the  
229 CLISA is performed at 37 °C, which is an isothermal process without the need for a thermal cycling  
230 program. It is worth noting that the CLISA procedure is completely compatible with existing commercial  
231 ELISA  
232 equipment. Although the experiments herein were performed manually, it is obvious that this method is  
233 compatible with current high throughput liquid handling robots for washing plates and reagent dispersion.  
234 Due to its improved sensitivity over commercial ELISA kits and its adaptability to high throughput and  
235 automation technologies, CLISA is able to detect low-abundance proteins that conventional ELISA cannot.  
236 In addition, we compared CLISA with several other immunological methods (Table 2). This work shows  
237 that our CLISA method is superior in sensitivity to most of the reported amplification strategies. Although  
238 the T7 transcription amplification assay reports a better sensitivity, the CLISA method demonstrates superior  
239 linearity and speed.

240

241 **Table 2.** Comparison of protein test results across published reports.

| Analytical methods                           | Sensitivity | Dynamic range | Isothermal | Time to result | Additional instrument | Target        |
|----------------------------------------------|-------------|---------------|------------|----------------|-----------------------|---------------|
| CLISA (this work)                            | 0.8 fM      | 3-logs        | √          | 4.5 h          | ×                     | IL-6,<br>VEGF |
| ELISA (this work)                            | 12 pM       | 3-logs        | √          | 3.5 h          | ×                     | IL-6,<br>VEGF |
| Nanozyme <sup>7</sup>                        | 835 fM      | 2-logs        | √          | 1.4 h          | √                     | CEA           |
| Nanoprobe <sup>9</sup>                       | 33 fM       | 3-logs        | √          | 2 h            | ×                     | IL-6          |
| Immune-PCR <sup>12</sup>                     | 5 fM        | 5-logs        | ×          | 5 h            | √                     | VEGF          |
| Immune-HCR <sup>16</sup>                     | 500 fM      | 3-logs        | ×          | 3 h            | √                     | IL-2,9,10     |
| Immune-RCA <sup>14</sup>                     | 50 fM       | 3-logs        | ×          | 3 h            | √                     | IL-6          |
| Proximity ligation assay <sup>18</sup>       | 10 fM       | 5-logs        | ×          | 2 h            | √                     | VEGF          |
| T7 transcription amplification <sup>19</sup> | 0.08 fM     | 3-logs        | √          | 7 h            | ×                     | Her2          |

242

## 243 CONCLUSIONS

244 In summary, we developed a highly sensitive, isothermal method for detecting low-abundance proteins  
 245 based on the collateral cleavage activity of CRISPR/Cas13a initiated by trigger RNA. The sensitivity of  
 246 CLISA was effectively improved by the amplification of T7 transcription and the collateral cleavage activity  
 247 of CRISPR/Cas13a. Using human IL-6 and human VEGF as model analytes, the sensitivity of CLISA has  
 248 been drastically boosted, with a LOD as low as 45.81 fg/mL (2.29 fM, 264-fold improvement) and 32.27  
 249 fg/mL (0.81 fM, 617-fold improvement) compared to commercialized ELISA kits. Moreover, the method is  
 250 a compatible, automated and high-throughput assay that allows for rapid screening of large numbers of  
 251 samples simultaneously, providing potential ultrasensitive detection methods for biosensing, medical  
 252 research, and molecular diagnostics.

253

254 **ASSOCIATED CONTENT**

255 **Supporting Information**

256

257 **AUTHOR INFORMATION**

258 **Corresponding Author**

259 \* **E-mail:** [wangpo@jsnu.edu.cn](mailto:wangpo@jsnu.edu.cn); [zhouxm@scnu.edu.cn](mailto:zhouxm@scnu.edu.cn)

260 **Notes**

261 The authors declare no competing financial interest.

262

263 **ACKNOWLEDGMENTS**

264 We thank Professor Yanli Wang for supplying the plasmid for LbuCas13a expression. This work was supported by  
265 the National Natural Science Foundation of China (Grant 21475048; 21874049, 21904042, 21675067), the  
266 National Science Fund for Distinguished Young Scholars of Guangdong Province (Grant 2014A030306008), the  
267 National Key Research and Development Program of China (Grant 2016YFD0501300), and the Natural Science  
268 Foundation of Jiangsu Province (No. BE2019645), and the Foundation of Postgraduate Research and the Practical  
269 Innovation Program of Jiangsu Normal University (No. 2018YXJ124).

270

271 **REFERENCES**

- 272 (1) Wild, D. The immunoassay handbook: theory and applications of ligand binding, ELISA and related techniques.  
273 *(fourth ed.)*, Elsevier Science, Amsterdam, The Netherlands (2013), p. **2013**.
- 274 (2) Han, K. N.; Li, C. A.; Seong, G. H. Microfluidic chips for immunoassays. *Annu. Rev. Anal. Chem.* **2013**, 6, 119-141.
- 275 (3) Lequin, R. M. Enzyme immunoassay (EIA)/enzyme-linked immunosorbent assay (ELISA). *Clin. Chem.* **2005**, 51,  
276 2415-2418.
- 277 (4) Dixit, C. K.; Vashist, S. K.; O'Neill, F. T.; O'Reilly, B.; MacCraith, B. D.; O'Kennedy, R. Development of a high  
278 sensitivity rapid sandwich ELISA procedure and its comparison with the conventional approach. *Anal. Chem.* **2010**, 82,  
279 7049-7052.

- 280 (5) De La Rica, R.; Stevens, M. M. Plasmonic ELISA for the ultrasensitive detection of disease biomarkers with the  
281 naked eye. *Nat. Nanotechnol.* **2012**, 7, 821.
- 282 (6) Duan, D.; Fan, K.; Zhang, D.; Tan, S.; Liang, M.; Liu, Y.; Zhang, J.; Zhang, P.; Liu, W.; Qiu, X., Nanozyme-strip for  
283 rapid local diagnosis of Ebola. *Biosens. Bioelectron.* **2015**, 74, 134-141.
- 284 (7) Yu, Z.; Tang, Y.; Cai, G.; Ren, R.; Tang, D. Paper Electrode-Based Flexible Pressure Sensor for Point-of-Care  
285 Immunoassay with Digital Multimeter. *Anal. Chem.* **2019**, 91, 1222-1226.
- 286 (8) Thaxton, C. S.; Elghanian, R.; Thomas, A. D.; Stoeva, S. I.; Lee, J.-S.; Smith, N. D.; Schaeffer, A. J.; Klocker, H.;  
287 Horninger, W.; Bartsch, G. Nanoparticle-based bio-barcode assay redefines “undetectable” PSA and biochemical  
288 recurrence after radical prostatectomy. *Proc. Natl. Acad. Sci.* **2009**, 106, 18437-18442.
- 289 (9) Jiao, L.; Yan, H.; Xu, W.; Wu, Y.; Gu, W.; Li, H.; Du, D.; Lin, Y.; Zhu, C. Self-Assembly of All-Inclusive Allochroic  
290 Nanoparticles for the Improved ELISA. *Anal. Chem.* **2019**, 91, 8461-8465.
- 291 (10) Sano, T.; Smith, C. L.; Cantor, C. R. Immuno-PCR: very sensitive antigen detection by means of specific  
292 antibody-DNA conjugates. *Science* **1992**, 258, 120-122.
- 293 (11) Niemeyer, C. M.; Adler, M.; Wacker, R. Detecting antigens by quantitative immuno-PCR. *Nat. Protoc.* **2007**, 2,  
294 1918.
- 295 (12) Sims, P. W.; Vasser, M.; Wong, W. L.; Williams, P. M.; Meng, Y. G. Immunopolymerase chain reaction using  
296 real-time polymerase chain reaction for detection. *Anal. Biochem.* **2000**, 281, 230-2.
- 297 (13) Niemeyer, C. M.; Adler, M.; Wacker, R. Immuno-PCR: high sensitivity detection of proteins by nucleic acid  
298 amplification. *Trends Biotechnol.* **2005**, 23, 208-216.
- 299 (14) Schweitzer, B.; Roberts, S.; Grimwade, B.; Shao, W.; Wang, M.; Fu, Q.; Shu, Q.; Laroche, I.; Zhou, Z.; Tchernev,  
300 V. T.; Christiansen, J.; Velleca, M.; Kingsmore, S. F. Multiplexed protein profiling on microarrays by rolling-circle  
301 amplification. *Nat. Biotechnol.* **2002**, 20, 359-365.
- 302 (15) Zhang, B.; Liu, B.; Tang, D.; Niessner, R.; Chen, G.; Knopp, D. DNA-based hybridization chain reaction for  
303 amplified bioelectronic signal and ultrasensitive detection of proteins. *Anal. Chem.* **2012**, 84, 5392-5399.
- 304 (16) Choi, J.; Love, K. R.; Gong, Y.; Gierahn, T. M.; Love, J. C. Immuno-hybridization chain reaction for enhancing  
305 detection of individual cytokine-secreting human peripheral mononuclear cells. *Anal. Chem.* **2011**, 83, 6890-5.
- 306 (17) Fredriksson, S.; Gullberg, M.; Jarvis, J.; Olsson, C.; Pietras, K.; Gústafsdóttir, S. M.; Östman, A.; Landegren, U.,  
307 Protein detection using proximity-dependent DNA ligation assays. *Nat. Biotechnol.* **2002**, 20, 473.

- 308 (18) Gullberg, M.; Gustafsdottir, S. M.; Schallmeiner, E.; Jarvius, J.; Bjarnegard, M.; Betsholtz, C.; Landegren, U.;  
309 Fredriksson, S. Cytokine detection by antibody-based proximity ligation. *Proc. Natl. Acad. Sci. U. S. A.* **2004**, 101,  
310 8420-4.
- 311 (19) Zhang, H.; Cheng, X.; Richter, M.; Greene, M. I. A sensitive and high-throughput assay to detect low-abundance  
312 proteins in serum. *Nat. Med.* **2006**, 12, 473.
- 313 (20) Gootenberg, J. S.; Abudayyeh, O. O.; Lee, J. W.; Essletzbichler, P.; Dy, A. J.; Joung, J.; Verdine, V.; Donghia, N.;  
314 Daringer, N. M.; Freije, C. A. Nucleic acid detection with CRISPR-Cas13a/C2c2. *Science* **2017**, 356, 438-442.
- 315 (21) Abudayyeh, O. O.; Gootenberg, J. S.; Konermann, S.; Joung, J.; Slaymaker, I. M.; Cox, D. B.; Shmakov, S.;  
316 Makarova, K. S.; Semenova, E.; Minakhin, L. C2c2 is a single-component programmable RNA-guided RNA-targeting  
317 CRISPR effector. *Science* **2016**, 353, aaf5573.
- 318 (22) East-Seletsky, A.; O'Connell, M. R.; Knight, S. C.; Burstein, D.; Cate, J. H.; Tjian, R.; Doudna, J. A. Two distinct  
319 RNase activities of CRISPR-C2c2 enable guide-RNA processing and RNA detection. *Nature* **2016**, 538, 270.
- 320 (23) Shan, Y.; Zhou, X.; Huang, R.; Xing, D. High-Fidelity and Rapid Quantification of miRNA Combining crRNA  
321 Programmability and CRISPR/Cas13a trans-Cleavage Activity. *Anal. Chem.* **2019**, 91, 5278-5285.
- 322 (24) Tian, T.; Shu, B.; Liu, L.; Zhou, X. Droplet-digital Cas13a assay enables direct single-molecule microRNA  
323 quantification. *bioRxiv* **2019**, 748939.
- 324 (25) Rotter, V.; Nagaev, I.; Smith, U. Interleukin-6 (IL-6) induces insulin resistance in 3T3-L1 adipocytes and is, like  
325 IL-8 and tumor necrosis factor- $\alpha$ , overexpressed in human fat cells from insulin-resistant subjects. *J. Biol. Chem.* **2003**,  
326 278, 45777-45784.
- 327 (26) Sansone, P.; Storci, G.; Tavolari, S.; Guarnieri, T.; Giovannini, C.; Taffurelli, M.; Ceccarelli, C.; Santini, D.;  
328 Paterini, P.; Marcu, K. B. IL-6 triggers malignant features in mammospheres from human ductal breast carcinoma and  
329 normal mammary gland. *J. Clin. Invest.* **2007**, 117, 3988-4002.
- 330 (27) Salven, P.; Lymboussaki, A.; Heikkilä, P.; Jääskela-Saari, H.; Enholm, B.; Aase, K.; von Euler, G.; Eriksson, U.;  
331 Alitalo, K.; Joensuu, H. Vascular endothelial growth factors VEGF-B and VEGF-C are expressed in human tumors. *Am.*  
332 *J. Pathol.* **1998**, 153, 103-108.
